# Supplementary material for: Demography and the Age of Rare Variants
Source: PubMed Central journal article supplement (PMC4125085; doi:10.1371/journal.pgen.1004528), 2014-08-07

**A**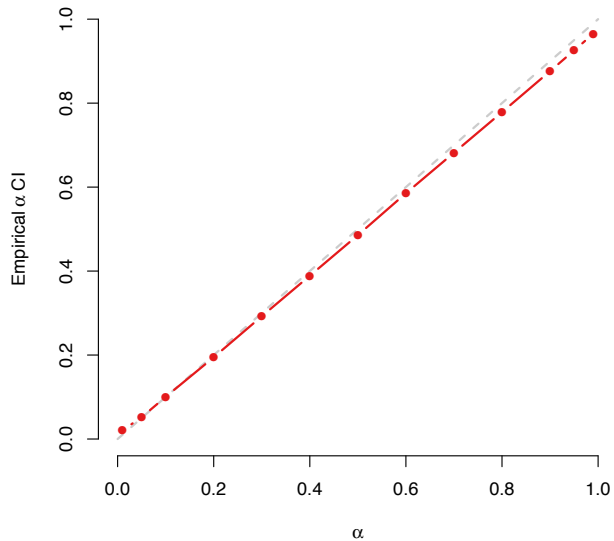**B**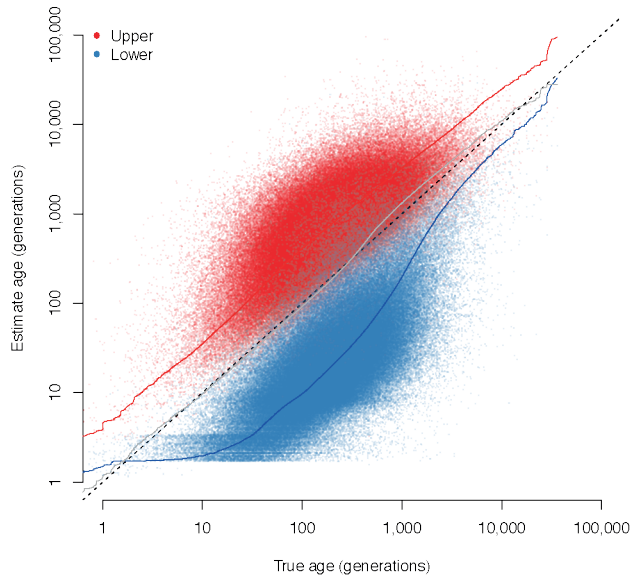

Supplement: pgen.1004528.s002.pdf [file pgen.1004528.s002.pdf]
