# Supplementary material for: Demography and the Age of Rare Variants
Source: PubMed Central journal article supplement (PMC4125085; doi:10.1371/journal.pgen.1004528), 2014-08-07

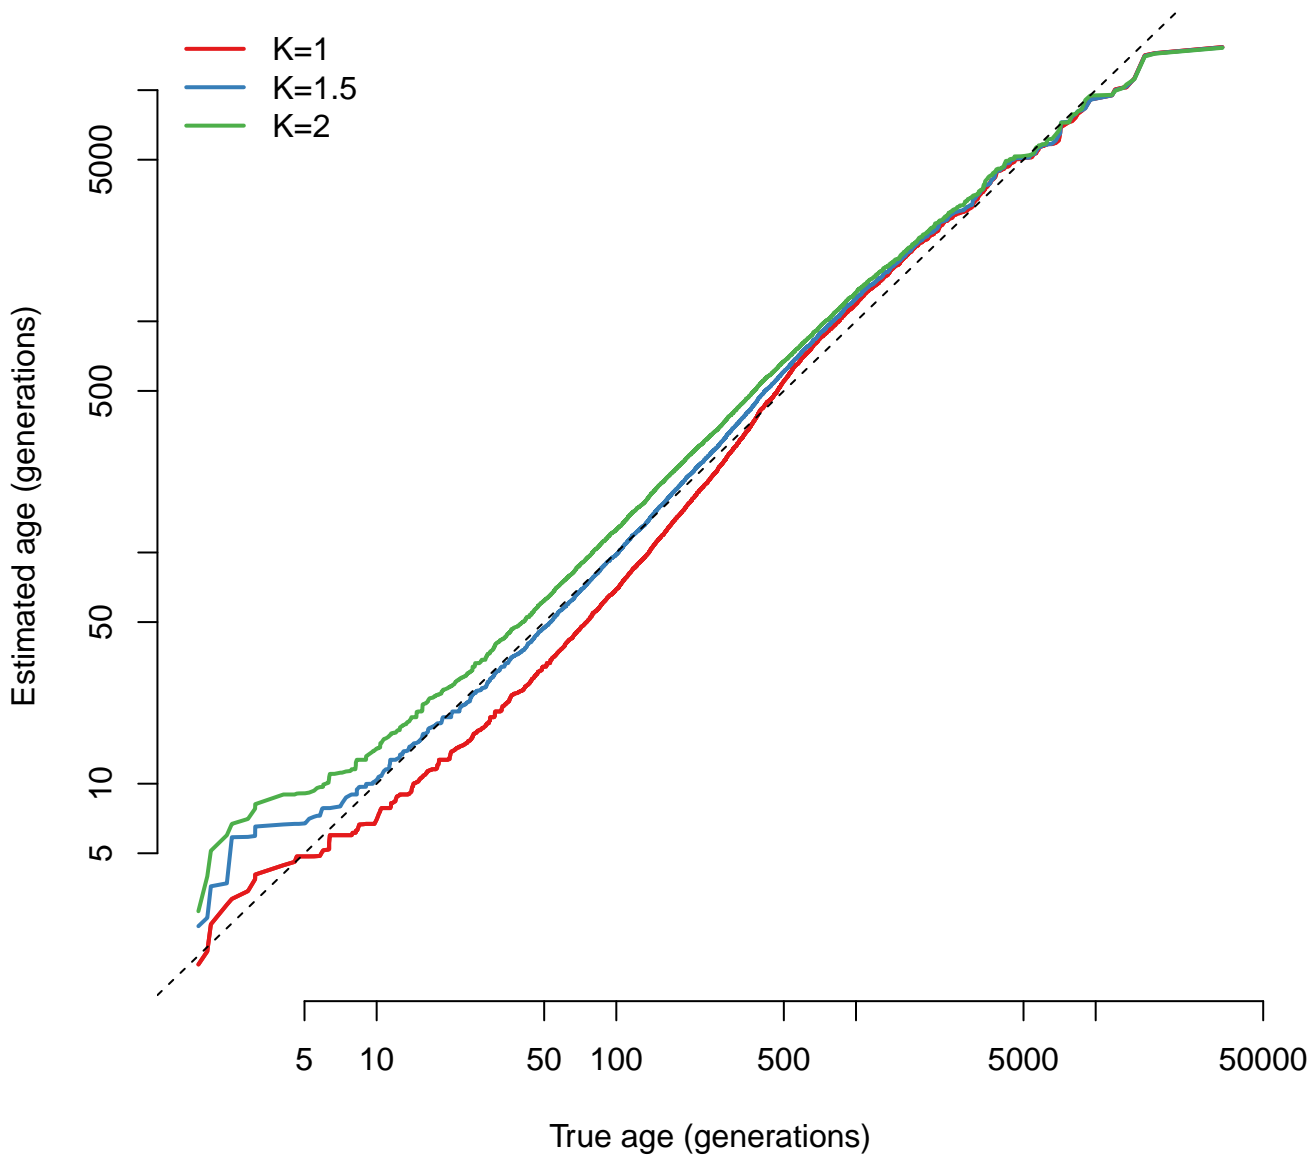

Supplement: pgen.1004528.s011.pdf [file pgen.1004528.s011.pdf]
